# Supplementary material for: Wound healing profiles of hyperopic-small incision lenticule extraction (SMILE)
Source: PubMed Central journal article supplement (PMC4945911; doi:10.1038/srep29802), 2016-07-15

**Wound healing profiles of hyperopic-small incision lenticule extraction  
(SMILE)**

Yu-Chi Liu,<sup>1,2</sup> Heng Pei Ang,<sup>1</sup> Ericia Pei Wen Teo,<sup>1</sup> Nyein Chan Lwin,<sup>1</sup> Gary Hin Fai  
Yam,<sup>1</sup> Jodhbir S. Mehta\*<sup>1-4</sup>

<sup>1</sup> Tissue Engineering and Stem Cell Group, Singapore Eye Research Institute,  
Singapore

<sup>2</sup> Singapore National Eye Centre, Singapore

<sup>3</sup> Department of Clinical Sciences, Duke-NUS Graduate Medical School, Singapore

<sup>4</sup> School of Material Science & Engineering and School of Mechanical and Aerospace  
Engineering, Nanyang Technological University

**Correspondence:**

Assoc Prof Jodhbir S. Mehta

Singapore National Eye Centre,

11 Third Hospital Avenue, Singapore 168751

Tel: +65-6227-7255; Fax: +65-6227-7290

E-mail: jodmehta@gmail.com

**Supplementary Table 1.** The measurement of IOP preoperatively and at 4 weeks postoperatively for different experimental groups

|                      | <b>Preoperatively (mmHg)</b> | <b>4 weeks postoperatively (mmHg)</b> | <b>P value*</b> |
|----------------------|------------------------------|---------------------------------------|-----------------|
| <b>SMILE +2.00 D</b> | 7.3 ± 1.1                    | 6.3 ± 1.3                             | 0.124           |
| <b>SMILE +4.00 D</b> | 7.4 ± 1.6                    | 7.0 ± 2.0                             | 0.166           |
| <b>SMILE-W2D</b>     | 7.9 ± 1.5                    | 7.8 ± 0.2                             | 0.356           |
| <b>SMILE -W4D</b>    | 8.2 ± 0.5                    | 8.0 ± 0.8                             | 0.244           |
| <b>LASIK +2.00 D</b> | 8.0 ± 1.4                    | 7.0 ± 0.8                             | 0.101           |
| <b>LASIK +4.00 D</b> | 8.4 ± 0.4                    | 7.4 ± 0.5                             | 0.184           |
| <b>Control</b>       | 8.2 ± 0.2                    | 9.0 ± 0.2                             | 0.273           |

\*Comparison between the measurements preoperatively and at 4 weeks postoperatively. Paired-t test.

### **SUPPLEMENTARY FIGURE LEGENDS**

**Figure S1.** Representative slit lamp biomicroscopy of corneas at 4 weeks after hyperopic-SMILE (+4.00 D, A) and hyperopic-LASIK (+4.00 D, B).

All the corneas remained clear, and there was no corneal haze formation throughout the study period.

**Figure S2.** Hematoxylin-eosin (H&E) histochemistry of corneas at 1 week and 4 weeks after surgery. The small peripheral incision or flap incision (arrows) was healed by the regrowth of new epithelium within 1 week. No apparent inflammatory cells or fibrotic scar tissue was

observed in the entire cornea. Original magnification: 10X, scale bar 100 μm.

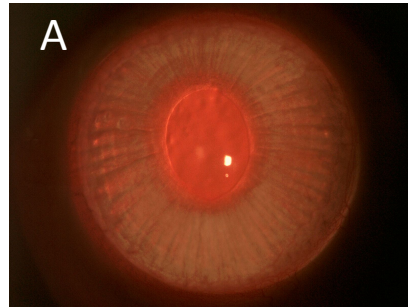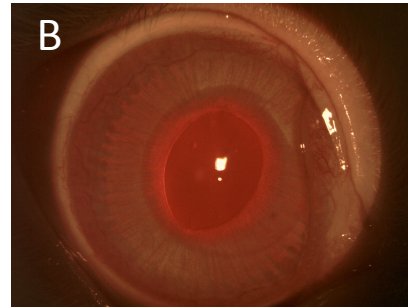

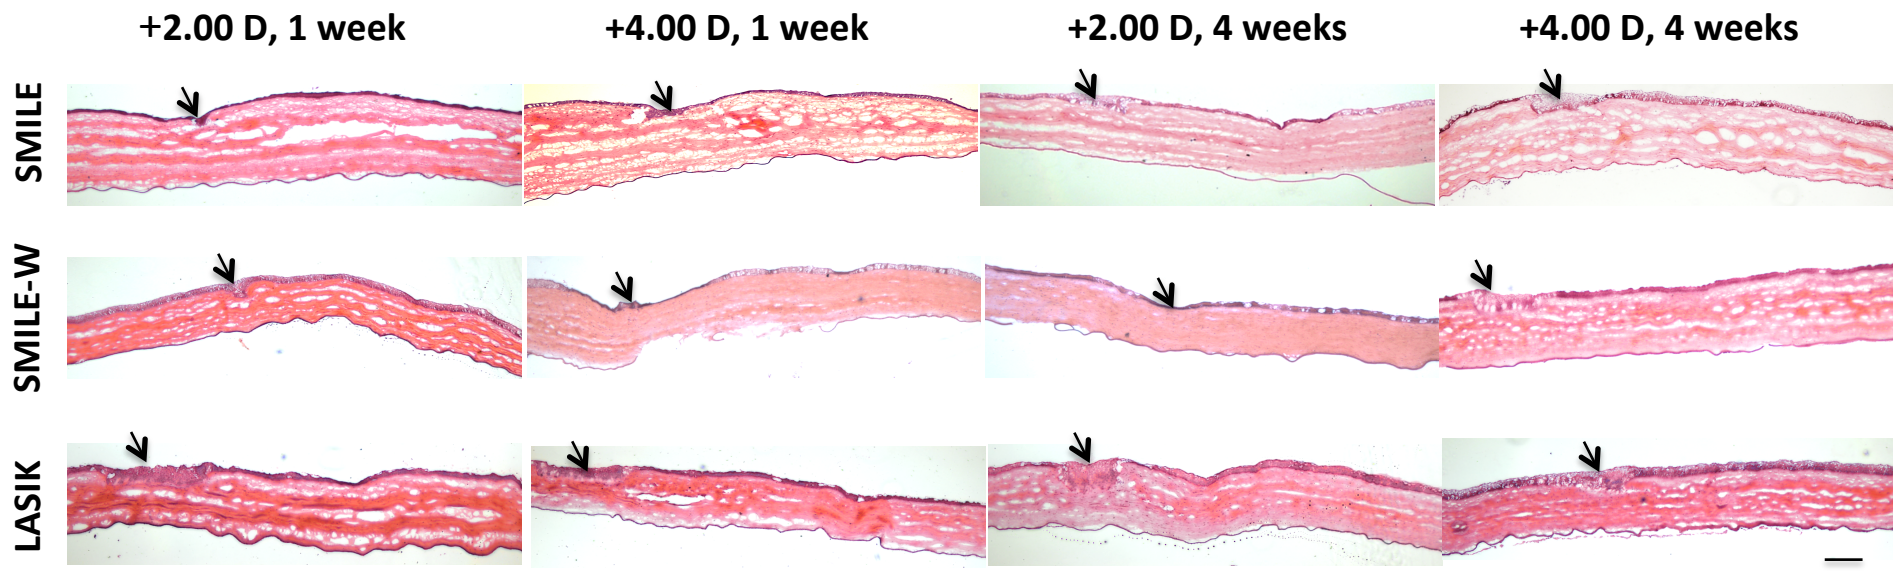

+2.00 D, 1 week

+4.00 D, 1 week

+2.00 D, 4 weeks

+4.00 D, 4 weeks

SMILE

SMILE-W

LASIK

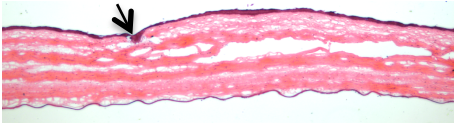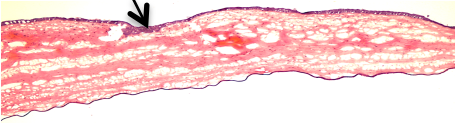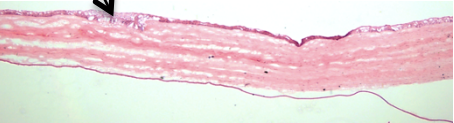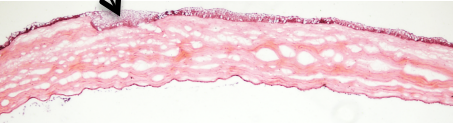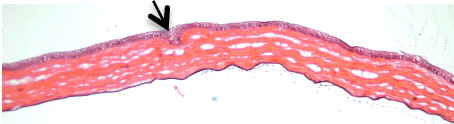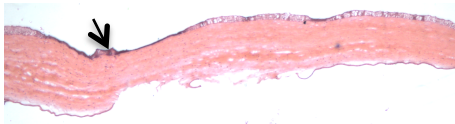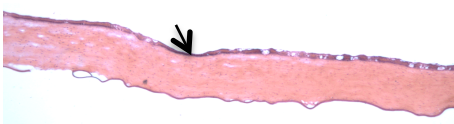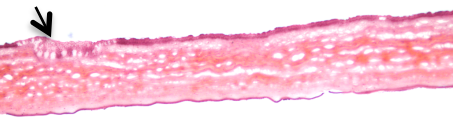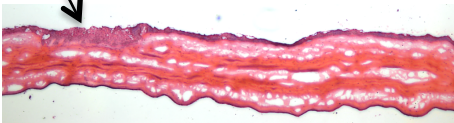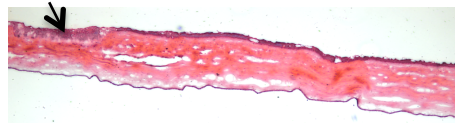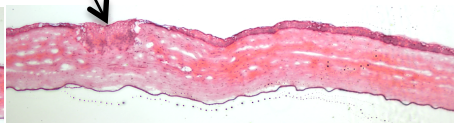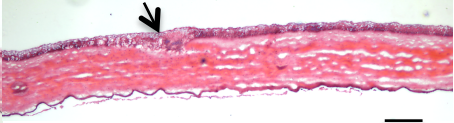

Supplement: srep29802-s1.pdf [file srep29802-s1.pdf]
